# Supplementary material for: A cascade signal amplification strategy for sensitive and label-free DNA detection based on Exo III-catalyzed recycling coupled with rolling circle amplification
Source: Royal Society of Chemistry journal article supplement (doi:10.1039/c4an00389f), 2014-01-01
Supplement: c4an00389f1.pdf [file c4an00389f1.pdf]

## Supplementary Information

### **Cascade Signal Amplification Strategy for Sensitive and Label-free DNA Detection Based on Exo III-catalyzed Recycling Coupled with Rolling Circle Amplification**

Xingtí Liu,<sup>a</sup> Qingwang Xue,<sup>a</sup> Yongshun Ding,<sup>a</sup> Jing Zhu,<sup>a</sup> Lei Wang,<sup>b</sup> Wei Jiang <sup>\*a</sup>

<sup>a</sup> *Key Laboratory for Colloid and Interface Chemistry of Education Ministry, School of Chemistry and Chemical Engineering, Shandong University, 250100 Jinan, P.R.*

*China*

<sup>b</sup> *School of Pharmaceutical Sciences, Shandong University, 250012 Jinan, P. R.*

*China*

Corresponding author. Tel.: +86 531 88362588; Fax: +86 531 88564464;

E-mail address: [wjiang@sdu.edu.cn](mailto:wjiang@sdu.edu.cn)

## Results and discussion

### The time-dependent fluorescence response under different conditions

To demonstrate the feasibility of our cascade amplification strategy, time-dependent fluorescence response under different conditions were carried out. As shown in Fig. S1, in the absence of target DNA, the change of fluorescence intensity was almost negligible in 1 h (curve b). In contrast, in the present of 5 nM target, the cascade amplification assay could be performed and the fluorescence signal increased significantly (curve a). Moreover, it could be seen that the RCA process played a key role in the generation of fluorescence signal. Because the intensity of fluorescence signal stayed largely constant without RCA (curve c).

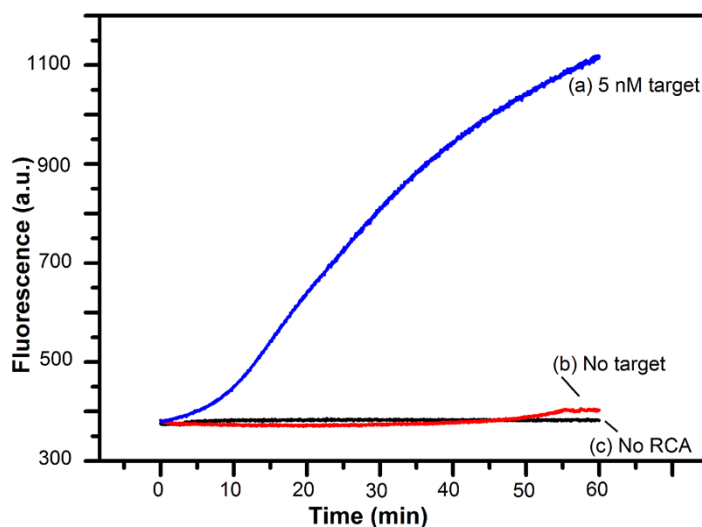

Fig. S1 The time-dependent fluorescence response under different conditions: in the present of 5 nM target DNA (a), in the absence of target DNA (b) and in the absence of RCA process (c). Other experimental conditions:  $5.0 \times 10^{-8}$  M of primer DNA,  $2.0 \times 10^{-7}$  M of circular DNA and  $3.0 \times 10^{-6}$  M of NMM.

### The signal amplification capacity of our cascade assay

In order to demonstrate the signal amplification capacity of the cascade amplification strategy, we compared our strategy with the RCA process (Fig. S2). In the cascade amplification experiment, three different concentrations of target DNA were chosen (50 pM, 0.5 nM and 5 nM) to initiate the Exo III recycling and followed by RCA. In the RCA experiment, primer DNA, with the same concentration as target DNA, was captured directly by the MNB-probe to conduct the RCA process. Under all the three different target and primer DNA concentrations, the cascade amplification strategy produced significantly higher signals than one-step RCA process. These

results implied that the presented strategy had a good signal amplification capacity for the detection of target DNA.

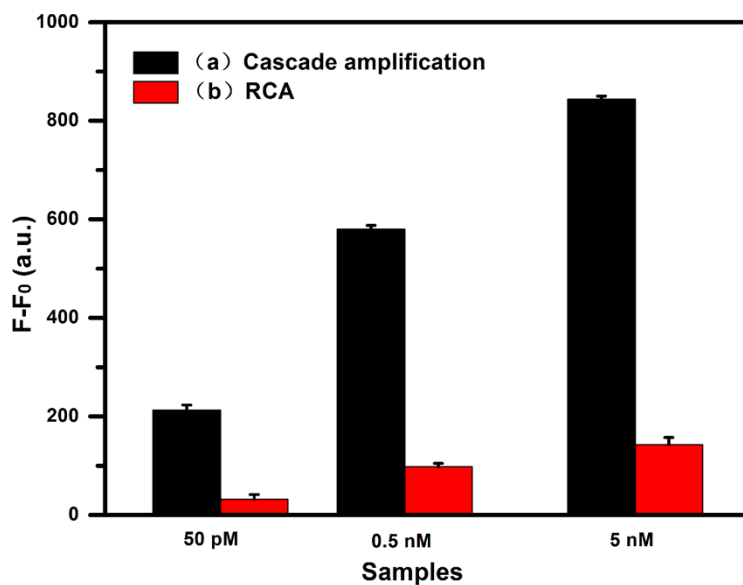

Fig. S2 The fluorescence signal generated by cascade amplification and RCA in three different concentrations of target DNA and primer DNA (50 pM, 0.5 nM, 5 nM). (a) cascade amplification process, template DNA was  $5.0 \times 10^{-7}$  M, probe DNA was  $5.0 \times 10^{-7}$  M, circular DNA was  $2.0 \times 10^{-7}$  M, NMM was  $3.0 \times 10^{-6}$  M; (b) RCA process, probe DNA was  $5.0 \times 10^{-7}$  M, circular DNA was  $2.0 \times 10^{-7}$  M, NMM was  $3.0 \times 10^{-6}$  M
